# Supplementary material for: Integrated analysis to reveal potential therapeutic targets and prognostic biomarkers of skin cutaneous melanoma
Source: Front Immunol. 2022 Aug 11;13:914108. doi: 10.3389/fimmu.2022.914108 (PMC9402985; doi:10.3389/fimmu.2022.914108)
Supplement: Supplementary file 4 [file Table_1.xlsx]

## Sheet: Sheet1
NO	Tissue	ID	Age	Gender	Staining
1	Normal	3298	51	Male	Medium
2	Normal	1970	69	Female	Medium
3	SKCM	935	82	Female	Low
4	SKCM	2586	82	Male	Low
