# Supplementary material for: Integrated analysis to reveal potential therapeutic targets and prognostic biomarkers of skin cutaneous melanoma
Source: Front Immunol. 2022 Aug 11;13:914108. doi: 10.3389/fimmu.2022.914108 (PMC9402985; doi:10.3389/fimmu.2022.914108)
Supplement: Supplementary file 5 [file Table_2.xlsx]

## Sheet: Sheet1
Characteristics	Total(N)	Odds Ratio(OR)	P value
T stage (T3&T4 vs. T1&T2)	364	0.607 (0.389-0.941)	0.026
N stage (N1&N2&N3 vs. N0)	414	0.599 (0.404-0.886)	0.011
M stage (M1 vs. M0)	443	0.914 (0.402-2.062)	0.828
Age (>60 vs. <=60)	463	0.766 (0.530-1.105)	0.154
BMI (>25 vs. <=25)	251	1.176 (0.686-2.039)	0.558
Gender (Male vs. Female)	471	1.184 (0.816-1.720)	0.373
Pathologic stage (Stage III&Stage IV vs. Stage I&Stage II)	412	0.648 (0.439-0.956)	0.029
Breslow depth (>3 vs. <=3)	360	0.560 (0.368-0.848)	0.006
