# Supplementary material for: Integrated analysis to reveal potential therapeutic targets and prognostic biomarkers of skin cutaneous melanoma
Source: Front Immunol. 2022 Aug 11;13:914108. doi: 10.3389/fimmu.2022.914108 (PMC9402985; doi:10.3389/fimmu.2022.914108)
Supplement: Supplementary file 6 [file Table_3.xlsx]

## Sheet: Sheet1
Characteristics	Total(N)	Odds Ratio(OR)	P value
T stage (T3&T4 vs. T1&T2)	364	0.754 (0.486-1.168)	0.207
N stage (N1&N2&N3 vs. N0)	414	1.037 (0.703-1.531)	0.853
M stage (M1 vs. M0)	443	1.273 (0.566-2.931)	0.561
Age (>60 vs. <=60)	463	0.819 (0.567-1.181)	0.285
BMI (>25 vs. <=25)	251	1.416 (0.837-2.411)	0.197
Gender (Male vs. Female)	471	1.184 (0.816-1.720)	0.373
Pathologic stage (Stage III&Stage IV vs. Stage I&Stage II)	412	1.062 (0.721-1.565)	0.759
Breslow depth (>3 vs. <=3)	360	0.765 (0.505-1.157)	0.205
