# Supplementary material for: Integrated analysis to reveal potential therapeutic targets and prognostic biomarkers of skin cutaneous melanoma
Source: Front Immunol. 2022 Aug 11;13:914108. doi: 10.3389/fimmu.2022.914108 (PMC9402985; doi:10.3389/fimmu.2022.914108)
Supplement: Supplementary file 7 [file Table_4.xlsx]

## Sheet: Sheet1
Characteristics	Total(N)	Odds Ratio(OR)	P value
T stage (T3&T4 vs. T1&T2)	364	0.368 (0.233-0.577)	<0.001
N stage (N1&N2&N3 vs. N0)	414	1.194 (0.809-1.764)	0.372
M stage (M1 vs. M0)	443	0.660 (0.281-1.488)	0.323
Age (>60 vs. <=60)	463	0.776 (0.537-1.119)	0.175
BMI (>25 vs. <=25)	251	1.488 (0.878-2.544)	0.142
Gender (Male vs. Female)	471	0.826 (0.568-1.198)	0.314
Pathologic stage (Stage III&Stage IV vs. Stage I&Stage II)	412	1.214 (0.824-1.790)	0.327
Breslow depth (>3 vs. <=3)	360	0.333 (0.216-0.510)	<0.001
