# Supplementary material for: Integrated analysis to reveal potential therapeutic targets and prognostic biomarkers of skin cutaneous melanoma
Source: Front Immunol. 2022 Aug 11;13:914108. doi: 10.3389/fimmu.2022.914108 (PMC9402985; doi:10.3389/fimmu.2022.914108)
Supplement: Supplementary file 8 [file Table_5.xlsx]

## Sheet: Sheet1
Characteristics	Total(N)	Odds Ratio(OR)	P value
T stage (T3&T4 vs. T1&T2)	364	0.453 (0.288-0.707)	<0.001
N stage (N1&N2&N3 vs. N0)	414	1.249 (0.846-1.846)	0.264
M stage (M1 vs. M0)	443	0.778 (0.338-1.750)	0.545
Age (>60 vs. <=60)	463	0.643 (0.444-0.928)	0.019
BMI (>25 vs. <=25)	251	1.424 (0.837-2.447)	0.195
Gender (Male vs. Female)	471	0.796 (0.548-1.156)	0.231
Pathologic stage (Stage III&Stage IV vs. Stage I&Stage II)	412	1.219 (0.828-1.797)	0.316
Breslow depth (>3 vs. <=3)	360	0.386 (0.251-0.588)	<0.001
