# Supplementary material for: Integrated analysis to reveal potential therapeutic targets and prognostic biomarkers of skin cutaneous melanoma
Source: Front Immunol. 2022 Aug 11;13:914108. doi: 10.3389/fimmu.2022.914108 (PMC9402985; doi:10.3389/fimmu.2022.914108)
Supplement: Supplementary file 9 [file Table_6.xlsx]

## Sheet: Sheet1
Characteristics	Total(N)	Odds Ratio(OR)	P value
T stage (T3&T4 vs. T1&T2)	364	0.368 (0.233-0.577)	<0.001
N stage (N1&N2&N3 vs. N0)	414	1.382 (0.936-2.046)	0.104
M stage (M1 vs. M0)	443	0.648 (0.276-1.460)	0.301
Age (>60 vs. <=60)	463	0.618 (0.427-0.893)	0.011
BMI (>25 vs. <=25)	251	1.325 (0.778-2.277)	0.303
Gender (Male vs. Female)	471	0.920 (0.634-1.335)	0.661
Pathologic stage (Stage III&Stage IV vs. Stage I&Stage II)	412	1.420 (0.964-2.096)	0.077
Breslow depth (>3 vs. <=3)	360	0.350 (0.227-0.535)	<0.001
