# Supplementary material for: Integrated analysis to reveal potential therapeutic targets and prognostic biomarkers of skin cutaneous melanoma
Source: Front Immunol. 2022 Aug 11;13:914108. doi: 10.3389/fimmu.2022.914108 (PMC9402985; doi:10.3389/fimmu.2022.914108)
Supplement: Supplementary file 11 [file Table_8.xlsx]

## Sheet: Sheet1
Characteristics	Total(N)	Univariate analysis			Multivariate analysis
		Hazard ratio (95% CI)	P value		Hazard ratio (95% CI)	P value
T stage	361
T1	41	Reference
T2	77	1.495 (0.811-2.756)	0.197		1.646 (0.834-3.248)	0.151
T3	90	2.097 (1.158-3.798)	0.015		1.953 (0.989-3.859)	0.054
T4	153	3.711 (2.070-6.653)	<0.001		4.153 (2.033-8.481)	<0.001
N stage	402
N0	224	Reference
N1	73	1.497 (1.014-2.210)	0.043		3.012 (1.018-8.914)	0.046
N2	49	1.534 (0.972-2.419)	0.066		3.840 (1.238-11.908)	0.02
N3	56	2.731 (1.769-4.215)	<0.001		7.504 (2.447-23.017)	<0.001
M stage	430
M0	406	Reference
M1	24	1.897 (1.029-3.496)	0.04		1.500 (0.564-3.990)	0.416
MALAT1	456	0.840 (0.744-0.948)	0.005		0.895 (0.770-1.041)	0.15
Age	456
<=60	246	Reference
>60	210	1.656 (1.251-2.192)	<0.001		1.128 (0.802-1.587)	0.488
Gender	456
Female	172	Reference
Male	284	1.172 (0.879-1.563)	0.281
BMI	241
<=25	79	Reference
>25	162	0.827 (0.513-1.333)	0.436
Pathologic stage	410
Stage I&Stage II	217	Reference
Stage III&Stage IV	193	1.617 (1.207-2.165)	0.001		0.515 (0.181-1.463)	0.213
Breslow depth	355	1.027 (1.014-1.041)	<0.001		1.001 (0.975-1.026)	0.968
