# Supplementary material for: Integrated analysis to reveal potential therapeutic targets and prognostic biomarkers of skin cutaneous melanoma
Source: Front Immunol. 2022 Aug 11;13:914108. doi: 10.3389/fimmu.2022.914108 (PMC9402985; doi:10.3389/fimmu.2022.914108)
Supplement: Supplementary file 12 [file Table_9.xlsx]

## Sheet: Sheet1
Characteristics	Total(N)	Univariate analysis			Multivariate analysis
		Hazard ratio (95% CI)	P value		Hazard ratio (95% CI)	P value
T stage	361
T1	41	Reference
T2	77	1.495 (0.811-2.756)	0.197		1.703 (0.864-3.357)	0.124
T3	90	2.097 (1.158-3.798)	0.015		2.055 (1.043-4.047)	0.037
T4	153	3.711 (2.070-6.653)	<0.001		4.439 (2.185-9.020)	<0.001
N stage	402
N0	224	Reference
N1	73	1.497 (1.014-2.210)	0.043		2.890 (0.976-8.556)	0.055
N2	49	1.534 (0.972-2.419)	0.066		3.699 (1.191-11.483)	0.024
N3	56	2.731 (1.769-4.215)	<0.001		7.346 (2.395-22.537)	<0.001
M stage	430
M0	406	Reference
M1	24	1.897 (1.029-3.496)	0.04		1.552 (0.586-4.108)	0.376
OIP5-AS1	456	0.850 (0.719-1.006)	0.059		0.921 (0.758-1.121)	0.413
Age	456
<=60	246	Reference
>60	210	1.656 (1.251-2.192)	<0.001		1.136 (0.808-1.599)	0.463
Gender	456
Female	172	Reference
Male	284	1.172 (0.879-1.563)	0.281
BMI	241
<=25	79	Reference
>25	162	0.827 (0.513-1.333)	0.436
Pathologic stage	410
Stage I&Stage II	217	Reference
Stage III&Stage IV	193	1.617 (1.207-2.165)	0.001		0.524 (0.185-1.489)	0.225
Breslow depth	355	1.027 (1.014-1.041)	<0.001		0.999 (0.974-1.026)	0.958
