# Supplementary material for: Integrated analysis to reveal potential therapeutic targets and prognostic biomarkers of skin cutaneous melanoma
Source: Front Immunol. 2022 Aug 11;13:914108. doi: 10.3389/fimmu.2022.914108 (PMC9402985; doi:10.3389/fimmu.2022.914108)
Supplement: Supplementary file 13 [file Table_10.xlsx]

## Sheet: Sheet1
Characteristics	Total(N)	Univariate analysis			Multivariate analysis
		Hazard ratio (95% CI)	P value		Hazard ratio (95% CI)	P value
T stage	361
T1	41	Reference
T2	77	1.495 (0.811-2.756)	0.197		1.433 (0.721-2.851)	0.305
T3	90	2.097 (1.158-3.798)	0.015		1.754 (0.884-3.479)	0.108
T4	153	3.711 (2.070-6.653)	<0.001		3.633 (1.774-7.440)	<0.001
N stage	402
N0	224	Reference
N1	73	1.497 (1.014-2.210)	0.043		2.545 (0.858-7.555)	0.092
N2	49	1.534 (0.972-2.419)	0.066		3.662 (1.181-11.354)	0.025
N3	56	2.731 (1.769-4.215)	<0.001		7.420 (2.426-22.694)	<0.001
M stage	430
M0	406	Reference
M1	24	1.897 (1.029-3.496)	0.04		1.519 (0.574-4.022)	0.4
PTPRC	456	0.817 (0.757-0.881)	<0.001		0.842 (0.764-0.927)	<0.001
Age	456
<=60	246	Reference
>60	210	1.656 (1.251-2.192)	<0.001		1.119 (0.794-1.578)	0.521
Gender	456
Female	172	Reference
Male	284	1.172 (0.879-1.563)	0.281
BMI	241
<=25	79	Reference
>25	162	0.827 (0.513-1.333)	0.436
Pathologic stage	410
Stage I&Stage II	217	Reference
Stage III&Stage IV	193	1.617 (1.207-2.165)	0.001		0.568 (0.200-1.612)	0.288
Breslow depth	355	1.027 (1.014-1.041)	<0.001		0.997 (0.971-1.024)	0.819
