# Supplementary material for: Integrated analysis to reveal potential therapeutic targets and prognostic biomarkers of skin cutaneous melanoma
Source: Front Immunol. 2022 Aug 11;13:914108. doi: 10.3389/fimmu.2022.914108 (PMC9402985; doi:10.3389/fimmu.2022.914108)
Supplement: Supplementary file 14 [file Table_11.xlsx]

## Sheet: Sheet1
Characteristics	Total(N)	Univariate analysis			Multivariate analysis
		Hazard ratio (95% CI)	P value		Hazard ratio (95% CI)	P value
T stage	361
T1	41	Reference
T2	77	1.495 (0.811-2.756)	0.197		1.476 (0.740-2.944)	0.27
T3	90	2.097 (1.158-3.798)	0.015		1.859 (0.940-3.678)	0.075
T4	153	3.711 (2.070-6.653)	<0.001		3.973 (1.949-8.101)	<0.001
N stage	402
N0	224	Reference
N1	73	1.497 (1.014-2.210)	0.043		2.911 (0.985-8.605)	0.053
N2	49	1.534 (0.972-2.419)	0.066		3.860 (1.244-11.973)	0.019
N3	56	2.731 (1.769-4.215)	<0.001		7.712 (2.519-23.614)	<0.001
M stage	430
M0	406	Reference
M1	24	1.897 (1.029-3.496)	0.04		1.630 (0.616-4.315)	0.325
IL7R	456	0.841 (0.768-0.921)	<0.001		0.876 (0.785-0.977)	0.018
Age	456
<=60	246	Reference
>60	210	1.656 (1.251-2.192)	<0.001		1.087 (0.770-1.533)	0.636
Gender	456
Female	172	Reference
Male	284	1.172 (0.879-1.563)	0.281
BMI	241
<=25	79	Reference
>25	162	0.827 (0.513-1.333)	0.436
Pathologic stage	410
Stage I&Stage II	217	Reference
Stage III&Stage IV	193	1.617 (1.207-2.165)	0.001		0.520 (0.183-1.478)	0.22
Breslow depth	355	1.027 (1.014-1.041)	<0.001		1.001 (0.976-1.027)	0.949
