# Supplementary material for: Integrated analysis to reveal potential therapeutic targets and prognostic biomarkers of skin cutaneous melanoma
Source: Front Immunol. 2022 Aug 11;13:914108. doi: 10.3389/fimmu.2022.914108 (PMC9402985; doi:10.3389/fimmu.2022.914108)
Supplement: Supplementary file 15 [file Table_12.xlsx]

## Sheet: Sheet1
Characteristics	Total(N)	Univariate analysis			Multivariate analysis
		Hazard ratio (95% CI)	P value		Hazard ratio (95% CI)	P value
T stage	361
T1	41	Reference
T2	77	1.495 (0.811-2.756)	0.197		1.445 (0.727-2.872)	0.294
T3	90	2.097 (1.158-3.798)	0.015		1.804 (0.912-3.567)	0.09
T4	153	3.711 (2.070-6.653)	<0.001		3.600 (1.762-7.357)	<0.001
N stage	402
N0	224	Reference
N1	73	1.497 (1.014-2.210)	0.043		2.668 (0.901-7.901)	0.076
N2	49	1.534 (0.972-2.419)	0.066		3.612 (1.166-11.186)	0.026
N3	56	2.731 (1.769-4.215)	<0.001		7.427 (2.428-22.722)	<0.001
M stage	430
M0	406	Reference
M1	24	1.897 (1.029-3.496)	0.04		1.464 (0.552-3.885)	0.444
CD69	456	0.747 (0.666-0.837)	<0.001		0.806 (0.701-0.926)	0.002
Age	456
<=60	246	Reference
>60	210	1.656 (1.251-2.192)	<0.001		1.128 (0.801-1.589)	0.49
Gender	456
Female	172	Reference
Male	284	1.172 (0.879-1.563)	0.281
BMI	241
<=25	79	Reference
>25	162	0.827 (0.513-1.333)	0.436
Pathologic stage	410
Stage I&Stage II	217	Reference
Stage III&Stage IV	193	1.617 (1.207-2.165)	0.001		0.559 (0.197-1.584)	0.273
Breslow depth	355	1.027 (1.014-1.041)	<0.001		1.001 (0.976-1.027)	0.916
